# Supplementary material for: Molecular basis of the multifaceted functions of human leucyl-tRNA synthetase in protein synthesis and beyond
Source: PubMed Central journal article supplement (PMC7229842; doi:10.1093/nar/gkaa189), 2020-03-30
Supplement: gkaa189_supplemental_file.pdf [file gkaa189_supplemental_file.pdf]

## Supplementary tables and figures:

**Table S1.** Data collection and refinement statistics

| Measurement                                         | HcLRS_d106<br>+ LeuAMS + Nva2AA |       |        | HcLRS_d106<br>+ LeuAMS + AN6426-AMP |       |        |
|-----------------------------------------------------|---------------------------------|-------|--------|-------------------------------------|-------|--------|
| <b>Data collection</b>                              |                                 |       |        |                                     |       |        |
| Space group                                         | C222 <sub>1</sub>               |       |        | C222 <sub>1</sub>                   |       |        |
| Cell dimensions<br><i>a, b, c</i> (Å)               | 88.21                           | 94.68 | 680.05 | 88.85                               | 95.79 | 682.38 |
| $\alpha, \beta, \gamma$ (°)                         | 90                              | 90    | 90     | 90                                  | 90    | 90     |
| Resolution (Å) <sup>a</sup>                         | 50-3.00 (2.54-2.50)             |       |        | 50-3.00 (3.11-3.00)                 |       |        |
| <i>R</i> <sub>linear</sub>                          | 0.088 (0.704)                   |       |        | 0.116 (0.539)                       |       |        |
| <i>I</i> / $\sigma I$                               | 26.4 (2.4)                      |       |        | 9.4 (2.3)                           |       |        |
| Completeness (%)                                    | 99.9 (98.6)                     |       |        | 77.7 (74.2)                         |       |        |
| Redundancy                                          | 9.5 (6.2)                       |       |        | 4.1 (3.9)                           |       |        |
| <b>Refinement</b>                                   |                                 |       |        |                                     |       |        |
| Resolution (Å)                                      | 50-2.50                         |       |        | 50-3.0                              |       |        |
| No. reflections<br>(work/free)                      | 97695/4888                      |       |        | 43749/2242                          |       |        |
| <i>R</i> <sub>work</sub> / <i>R</i> <sub>free</sub> | 0.198/0.242                     |       |        | 0.211/0.261                         |       |        |
| No. atoms                                           |                                 |       |        |                                     |       |        |
| Protein                                             | 16212 (2 chains)                |       |        | 16210 (2 chains)                    |       |        |
| Water                                               | 682                             |       |        | 10                                  |       |        |
| Ligand                                              |                                 |       |        |                                     |       |        |
| LeuAMS                                              | 62 (2 molecules)                |       |        | 62 (2 molecules)                    |       |        |
| Nva2AA                                              | 26 (1molecule)                  |       |        |                                     |       |        |
| AN6426-AMP                                          |                                 |       |        | 76 (2 molecules)                    |       |        |
| <i>B</i> -factors                                   |                                 |       |        |                                     |       |        |
| Protein                                             | 65.5 (Chain A); 34.5(Chain B)   |       |        | 79.3(Chain A); 39.1(Chain B)        |       |        |
| water                                               | 36.3                            |       |        | 20.9                                |       |        |
| Ligand                                              |                                 |       |        |                                     |       |        |
| LeuAMS                                              | 46.1                            |       |        | 36.1                                |       |        |
| Nva2AA                                              | 40.2 (Chain B)                  |       |        |                                     |       |        |
| AN6426-AMP                                          |                                 |       |        | 59.4 (Chain B)                      |       |        |
| Bond lengths (Å)                                    | 0.004                           |       |        | 0.003                               |       |        |
| Bond angles (°)                                     | 0.632                           |       |        | 0.725                               |       |        |

<sup>a</sup> Values in parentheses are for the highest-resolution shell.

HeLRS 1 10 20 30 40 50 60 70 80 90  
 MmLRS  
 PhLRS  
 TlRS  
 EclRS  
 SplRS  
**HIGH motif**

HeLRS 110 120 130 140 150 160 170 180 190 200 210 220  
 MmLRS  
 PhLRS  
 TlRS  
 EclRS  
 SplRS

HeLRS 230 240 250 260 270 280 290  
 MmLRS  
 PhLRS  
 TlRS  
 EclRS  
 SplRS  
**T-rich**

HeLRS 300 310 320 330 340 350 360 370 380 390 400 410  
 MmLRS  
 PhLRS  
 TlRS  
 EclRS  
 SplRS  
**GTG loop**

HeLRS 420 430 440 450 460 470 480 490 500 510  
 MmLRS  
 PhLRS  
 TlRS  
 EclRS  
 SplRS

HeLRS 520 530 540 550 560 570 580 590 600 610 620 630  
 MmLRS  
 PhLRS  
 TlRS  
 EclRS  
 SplRS

HeLRS 630 640 650 660 670 680 690 700  
 MmLRS  
 PhLRS  
 TlRS  
 EclRS  
 SplRS

HeLRS 710 720 730 740 750 760 770 780 790  
 MmLRS  
 PhLRS  
 TlRS  
 EclRS  
 SplRS  
**KMSKS motif**

HeLRS 800 810 820 830 840 850 860 870 880 890 900  
 MmLRS  
 PhLRS  
 TlRS  
 EclRS  
 SplRS

HeLRS 910 920 930 940 950 960 970 980 990 1000 1010  
 MmLRS  
 PhLRS  
 TlRS  
 EclRS  
 SplRS  
**RagD binding**

HeLRS 1020 1030 1040 1050 1060 1070 1080 1090 1100 1110  
 MmLRS  
 PhLRS  
 TlRS  
 EclRS  
 SplRS

HeLRS 1120 1130 1140 1150 1160 1170  
 MmLRS  
 PhLRS  
 TlRS  
 EclRS  
 SplRS

**Figure S1.** Structure based sequence alignment of hcLRS with LRSs from representative species. The secondary structure elements of hcLRS are labeled in the top, and the conserved motifs of LRSs are marked in the bottom.

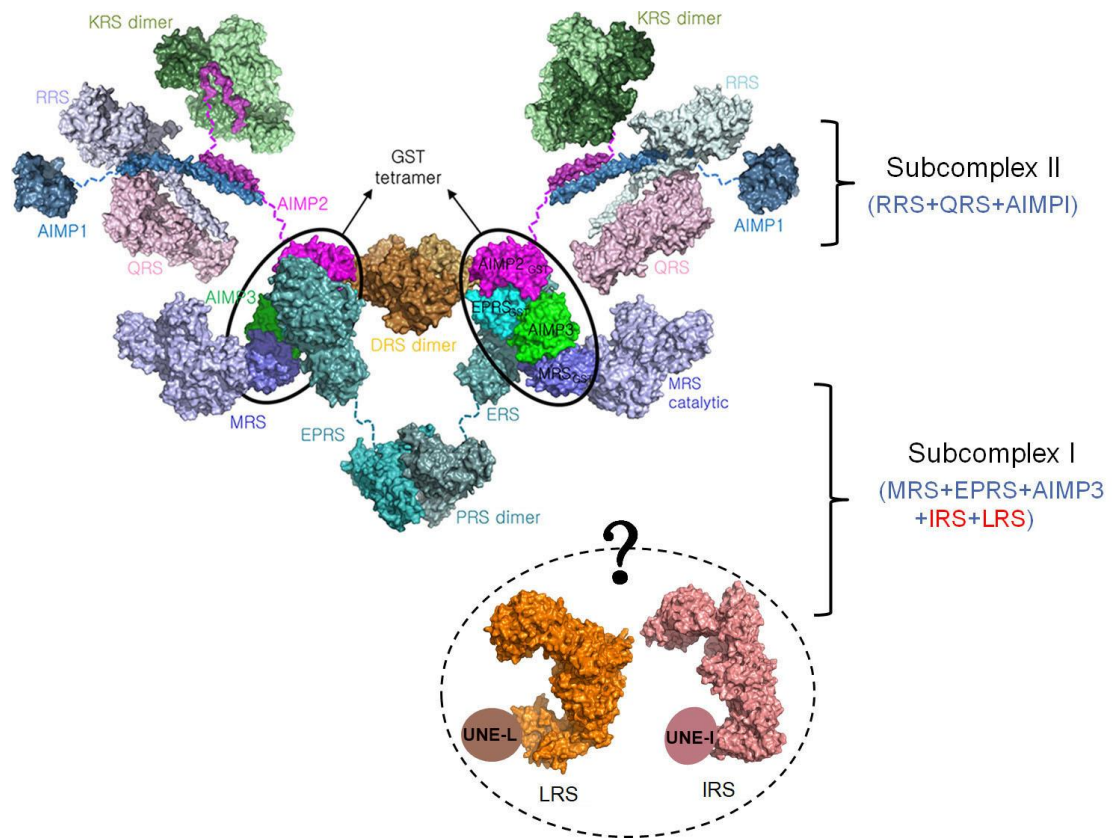

**Figure S2.** The model of MSC adapted from Cho et al, 2015. The surface model of LRS is from this study, and the surface model of IRS is generated based on the structure of bacterial IRS (PDB: 1FFY). The structures of UNE-L or UNE-I are unknown.

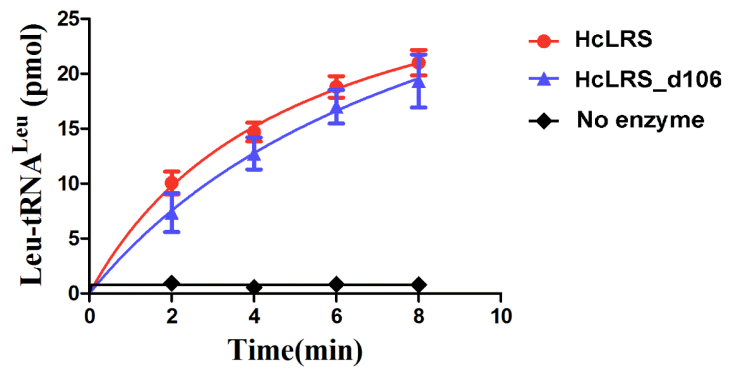

**Figure S3.** Diagram of the aminoacylation activity of full length hLRS and hLRS\_d106.

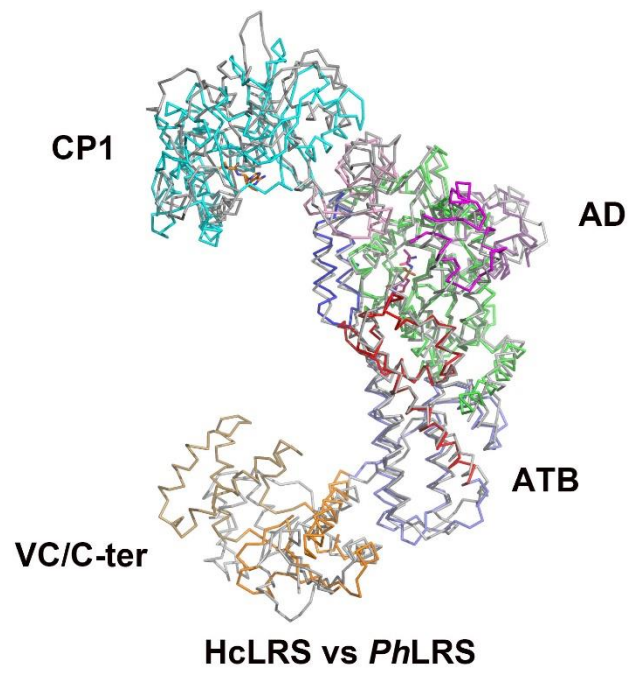

**Figure S4.** Superposition of hcLRS (colors are identical with Figure 1A) to *PhLRS* (light grey, only the protein part from PDB: 1WZ2) shown in ribbon.

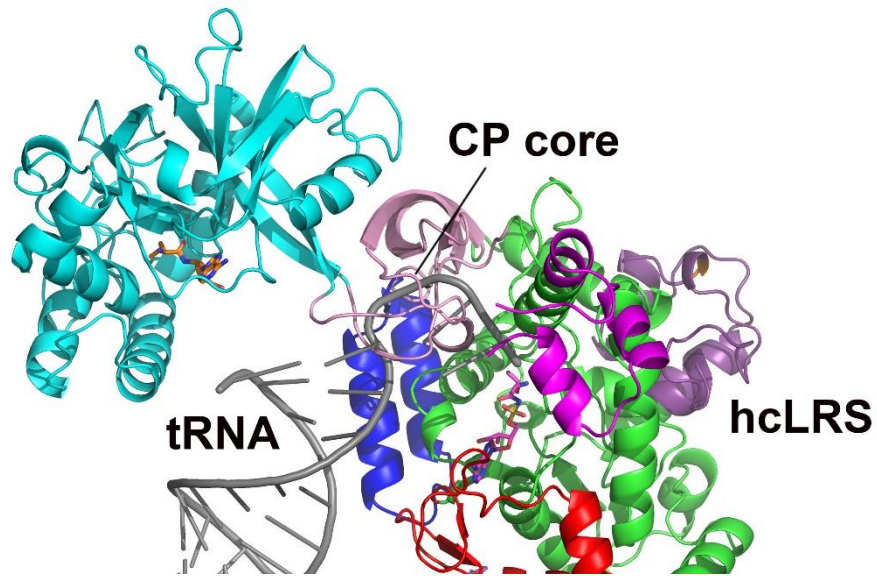

**Figure S5.** Superposition of hcLRS (colors are identical with Figure 1A) to the *Ph*LRS-tRNA complex (PDB: 1WZ2, only show the tRNA part). The CP core clashes with 3'-end of tRNA.

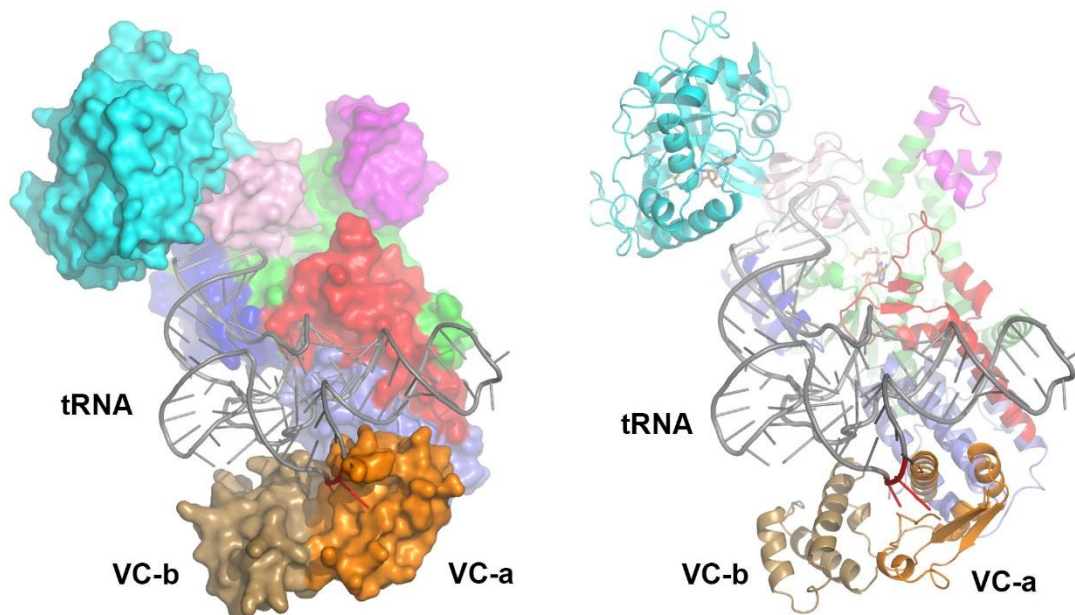

**Figure S6.** The proposed docking model of hcLRS-tRNA<sup>Leu</sup> complex. HcLRS is shown in surface (left) or in cartoon (right), the colors of each domain and motif are the same as those in Figure 1A, tRNA<sup>Leu</sup> is shown in grey. Two residues from the long variable loop of tRNA<sup>Leu</sup> that contact with VC domain are marked in red color.



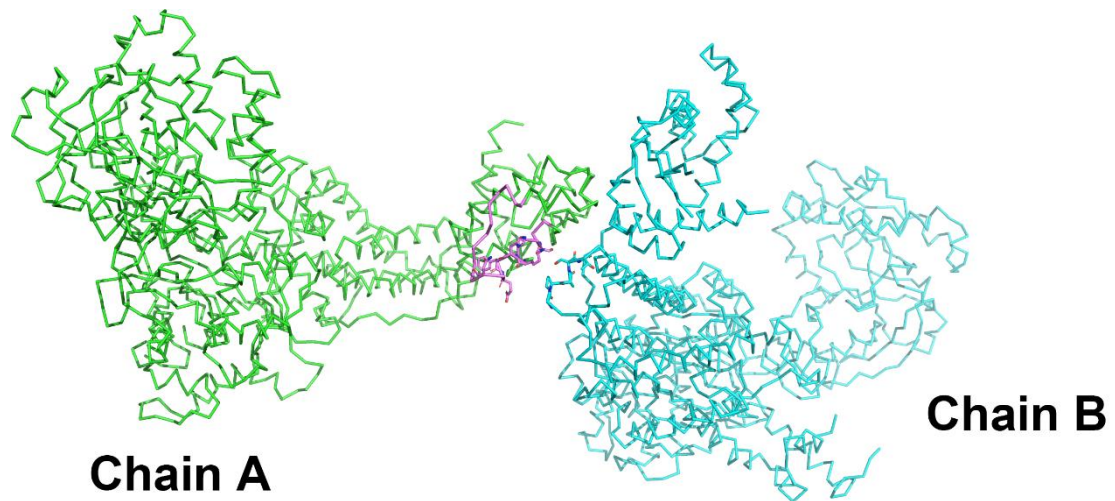

**Figure S7.** Ribbon diagram shows the crystal packing interface of hcLRS. The residues from the RagD binding peptide (magenta) of Chain A, and those that are interact with residues in the interface are shown in sticks.

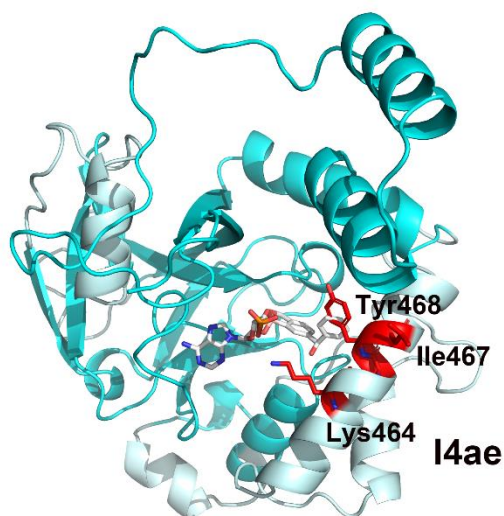

### HcLRS + ZCL039-AMP

**Figure S8.** Docking model of ZCL039-AMP (Shown in sticks with backbone in white color) into the editing site of hcLRS by superimposing the structure of hcLRS-CP1 to *Sp*LeuRS-CP1-ZCL039-AMP complex (PDB: 4K47). The ZCL039 moiety has steric clashes with residues (red color) from the I4ae insertion of hcLRS.
